# Supplementary material
Source: PubMed Central journal article supplement (PMC3761688)

**Supplementary figure 1: Identification of USP9X and USP7 by mass spectrometry analysis of MARCH7 pull downs.**

**A**

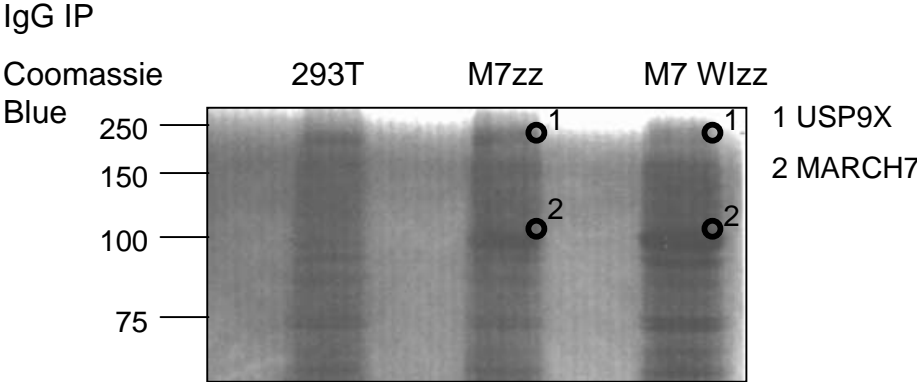

**B**

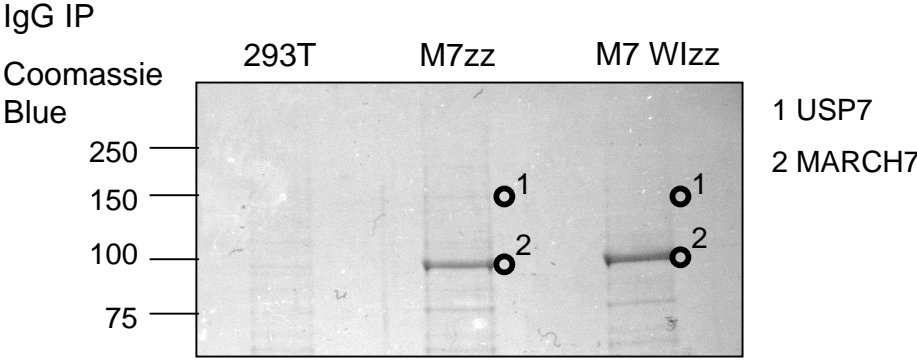

**Supplementary figure 2: MARCH7 sub-cellular localisation in the 3T3 mouse fibroblast cell line.**

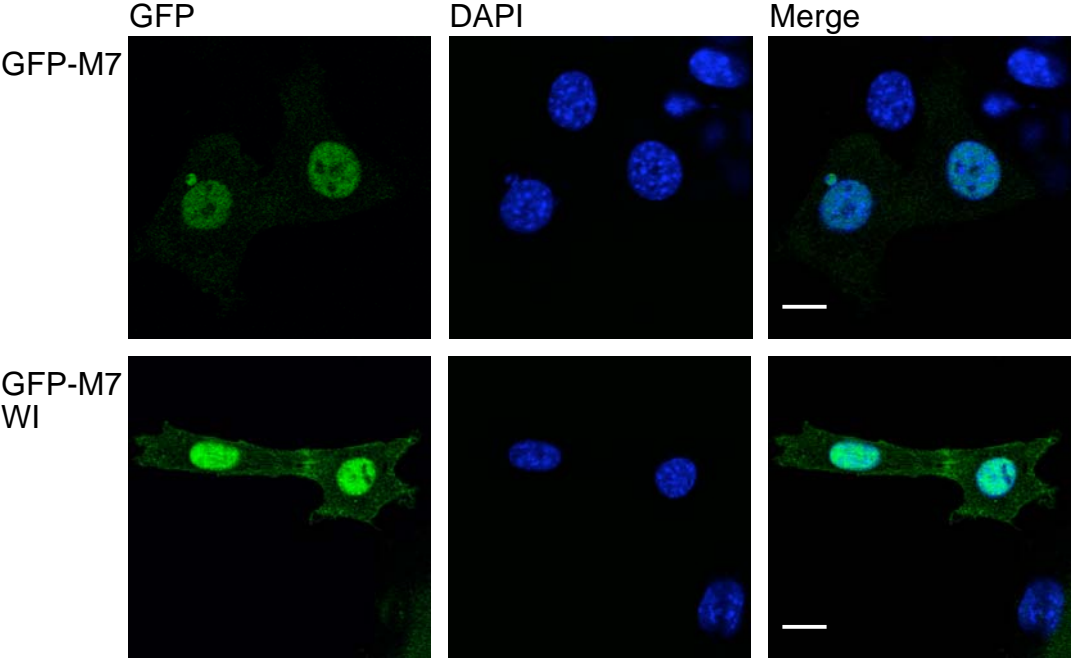

Supplement: NIHMS54567-supplement-01.pdf [file NIHMS54567-supplement-01.pdf]
